# Supplementary material for: Association of Maternal Psychosocial Stress With Increased Risk of Asthma Development in Offspring
Source: PubMed Central journal article supplement (PMC5982733; doi:10.1093/aje/kwx366), 2017-12-13
Supplement: kwx366magnuswebmaterialfinal.pdf [file kwx366magnuswebmaterialfinal.pdf]

**Web Table 1.** Questions used to obtain information of psychosocial stress, Norwegian Mother and Child Cohort Study, 2000–2007

| Scale Capturing Psychosocial Stress                        | Questions                                                                                                                        | Answer Options                                                                          |
|------------------------------------------------------------|----------------------------------------------------------------------------------------------------------------------------------|-----------------------------------------------------------------------------------------|
| Life-time history of major depressive symptoms             | Felt depressed, sad?                                                                                                             | Yes versus no                                                                           |
|                                                            | Had problems with appetite or eaten too much?                                                                                    |                                                                                         |
|                                                            | Been bothered by feeling weak or a lack of energy?                                                                               |                                                                                         |
|                                                            | Really blamed yourself and felt worthless?                                                                                       |                                                                                         |
|                                                            | Had problems with concentration or had problems making decisions?                                                                |                                                                                         |
| Five-item Symptom Checklist (SCL-5) for anxiety/depression | Constantly frightened or anxious?                                                                                                | A 4-point Likert scale ranging from 1 (not at all bothered) to 4 (very much bothered)   |
|                                                            | Nervous, inner turmoil?                                                                                                          |                                                                                         |
|                                                            | Feeling of hopelessness with regard to the future?                                                                               |                                                                                         |
|                                                            | Depressed, sad?                                                                                                                  |                                                                                         |
|                                                            | Frequently worried or uneasy?                                                                                                    |                                                                                         |
| Satisfaction With Life Scale (SWLS)                        | My life is largely what I wanted it to be                                                                                        | A seven point Likert scale ranging from disagree completely (1) to agree completely (7) |
|                                                            | My life is very good                                                                                                             |                                                                                         |
|                                                            | I am satisfied with my life                                                                                                      |                                                                                         |
|                                                            | To date, I have achieved what is important for me in my life                                                                     |                                                                                         |
|                                                            | If I could start all over, there is very little I would do differently                                                           |                                                                                         |
| Social support                                             | Do you have anyone other than your husband/partner you can ask for advice in a difficult situation? (Answer options              | 1-No, 2-Yes, 1 or 2 people, and 3-Yes, more than 2 people                               |
|                                                            | How often do you meet or talk on the telephone with your family (other than your husband/partner and children) or close friends? | 1-Once a month or less, 2-2-8 times a month, and 3-More than twice a week               |
|                                                            | Do you feel lonely?                                                                                                              | 1-Almost never, 2-Infrequently, 3-Sometimes, 4-Usually, and 5-Almost always             |
| 10-item Relationship Satisfaction (RS) scale               | My husband/partner and I have a close relationship                                                                               | A six point Likert scale ranging from (1) strongly disagree to (6) strongly agree       |
|                                                            | My partner and I have problems in our relationship                                                                               |                                                                                         |
|                                                            | I am very happy in my relationship                                                                                               |                                                                                         |
|                                                            | My partner is usually understanding                                                                                              |                                                                                         |
|                                                            | I often think about ending our relationship                                                                                      |                                                                                         |
|                                                            | I am satisfied with my relationship with my partner                                                                              |                                                                                         |
|                                                            | We often disagree about important decisions                                                                                      |                                                                                         |
|                                                            | I have been lucky in my choice of a partner                                                                                      |                                                                                         |
|                                                            | We agree about how children should be raised                                                                                     |                                                                                         |
|                                                            | I think my partner is satisfied with our relationship                                                                            |                                                                                         |
| Negative life events                                       | Have you had problems at work or where you study?                                                                                | Yes versus no                                                                           |
|                                                            | Have you had financial problems?                                                                                                 |                                                                                         |
|                                                            | Have you been divorced, separated or ended your relationship with your partner?                                                  |                                                                                         |
|                                                            | Have you had problems or conflicts with your family, friends or neighbors?                                                       |                                                                                         |
|                                                            | Have you been seriously ill or injured?                                                                                          |                                                                                         |
|                                                            | Has anyone close to you been seriously ill or injured?                                                                           |                                                                                         |
|                                                            | Have you been involved in a serious accident, fire or robbery?                                                                   |                                                                                         |
|                                                            | Have you lost someone close to you?                                                                                              |                                                                                         |
| Work stress                                                | I have physically heavy work                                                                                                     | A 4-point Likert scale ranging from (1) agree to (4) disagree                           |
|                                                            | My work is very stressful                                                                                                        |                                                                                         |
|                                                            | I learn a lot at work                                                                                                            |                                                                                         |
|                                                            | My work is very monotonous                                                                                                       |                                                                                         |
|                                                            | My work demands a lot of me                                                                                                      |                                                                                         |
|                                                            | I am able to decide how my work is to be carried out                                                                             |                                                                                         |
|                                                            | There is a good team spirit at my place of work                                                                                  |                                                                                         |
|                                                            | I enjoy my work                                                                                                                  |                                                                                         |

**Web Table 2.** Distribution of background characteristics (*N* (%)) among included and excluded individuals, Norwegian Mother and Child Cohort Study, 2000–2007

| Background Characteristic                                      | Maternal Psychosocial Stress     |                                  | Paternal Psychosocial Stress     |                                  |
|----------------------------------------------------------------|----------------------------------|----------------------------------|----------------------------------|----------------------------------|
|                                                                | Included<br>( <i>N</i> = 63,626) | Excluded<br>( <i>N</i> = 20,141) | Included<br>( <i>N</i> = 47,619) | Excluded<br>( <i>N</i> = 16,007) |
| Child asthma use of asthma medications at 7 years in the NorPD |                                  |                                  |                                  |                                  |
| No                                                             | 60,967 (95.8)                    | 19,230 (95.5)                    | 45,680 (95.9)                    | 15,287 (95.5)                    |
| Yes                                                            | 2,659 (4.2)                      | 911 (4.5)                        | 1,939 (4.1)                      | 720 (4.5)                        |
| Maternal age at delivery <sup>a</sup>                          | 30.1 (4.5)                       | 29.5 (5.1)                       | 30.1 (4.4)                       | 30.2 (4.7)                       |
| Maternal parity                                                |                                  |                                  |                                  |                                  |
| 0                                                              | 28,413 (44.7)                    | 7,382 (36.7)                     | 22,374 (47.0)                    | 6,039 (37.7)                     |
| 1                                                              | 22,650 (35.6)                    | 7,776 (38.6)                     | 16,617 (34.9)                    | 6,033 (37.7)                     |
| 2                                                              | 9,849 (15.5)                     | 3,693 (18.3)                     | 6,860 (14.4)                     | 2,989 (18.7)                     |
| 3+                                                             | 2,714 (4.3)                      | 1,290 (6.4)                      | 1,768 (3.7)                      | 946 (5.9)                        |
| Maternal education                                             |                                  |                                  |                                  |                                  |
| Less than high school                                          | 4,795 (7.6)                      | 1,903 (15.8)                     | 3,274 (6.9)                      | 1,521 (9.5)                      |
| High school                                                    | 19,318 (30.5)                    | 4,167 (34.6)                     | 13,851 (29.2)                    | 5,467 (34.3)                     |
| Up to four years of college                                    | 26,261 (41.4)                    | 3,962 (32.9)                     | 20,021 (42.2)                    | 6,240 (39.1)                     |
| More than four years of college                                | 12,996 (20.5)                    | 2,022 (16.8)                     | 10,267 (21.7)                    | 2,729 (17.1)                     |
| Missing                                                        | 256                              | 8,087                            | 206                              | 50                               |
| Maternal prepregnancy body mass index <sup>b</sup>             |                                  |                                  |                                  |                                  |
| <18.5                                                          | 1,817 (2.9)                      | 496 (4.3)                        | 1,340 (2.9)                      | 477 (3.1)                        |
| 18.5-24.9                                                      | 40,453 (65.3)                    | 7,315 (63.0)                     | 30,259 (65.2)                    | 10,194 (65.6)                    |
| 25-29.9                                                        | 13,854 (22.4)                    | 2,537 (21.9)                     | 10,397 (22.4)                    | 3,457 (22.2)                     |
| 30 or higher                                                   | 5,858 (9.5)                      | 1,264 (10.9)                     | 4,435 (9.6)                      | 1,423 (9.2)                      |
| Missing                                                        | 1,644                            | 8,529                            | 1,188                            | 456                              |
| Maternal smoking during pregnancy                              |                                  |                                  |                                  |                                  |
| No                                                             | 48,184 (76.2)                    | 8,380 (67.7)                     | 36,654 (77.3)                    | 11,530 (72.4)                    |
| Quit by 18 weeks                                               | 8,991 (14.2)                     | 1,941 (15.7)                     | 6,661 (14.0)                     | 2,330 (14.6)                     |
| Smoked after 18 weeks                                          | 6,182 (9.8)                      | 2,058 (16.6)                     | 4,112 (8.7)                      | 2,070 (13.0)                     |
| Missing                                                        | 269                              | 7,762                            | 192                              | 77                               |
| Maternal history of asthma                                     |                                  |                                  |                                  |                                  |
| No                                                             | 58,924 (92.6)                    | 11,159 (92.6)                    | 44,027 (92.5)                    | 14,897 (93.1)                    |
| Yes                                                            | 4,702 (7.4)                      | 1,012 (7.4)                      | 3,592 (7.5)                      | 1,110 (6.9)                      |
| Missing                                                        | 0                                | 7,970                            | 0                                | 0                                |
| Paternal age                                                   |                                  |                                  |                                  |                                  |
| <25                                                            | 2,851 (4.5)                      | 1,623 (8.1)                      | 2,083 (4.4)                      | 768 (4.8)                        |
| 25-29                                                          | 14,592 (22.9)                    | 4,657 (23.2)                     | 11,040 (23.2)                    | 3,552 (22.4)                     |
| 30-34                                                          | 25,101 (39.5)                    | 7,161 (35.7)                     | 19,235 (40.4)                    | 5,866 (36.9)                     |
| 35 and higher                                                  | 20,955 (33.0)                    | 6,609 (33.0)                     | 15,259 (32.1)                    | 5,696 (35.9)                     |
| Missing                                                        | 127                              | 91                               | 2                                | 125                              |

|                                 |               |              |               |               |
|---------------------------------|---------------|--------------|---------------|---------------|
| Paternal education              |               |              |               |               |
| Less than high school           | 6,772 (11.0)  | 1,749 (15.2) | 4,441 (9.6)   | 2,331 (15.1)  |
| High school                     | 25,631 (41.5) | 5,003 (43.5) | 18,691 (40.4) | 6,940 (45.0)  |
| Up to four years of college     | 16,679 (27.0) | 2,593 (22.6) | 13,082 (28.3) | 3,597 (23.3)  |
| More than four years of college | 12,638 (20.5) | 2,146 (18.7) | 10,089 (21.8) | 2,549 (16.5)  |
| Missing                         | 1,906         | 8,650        | 1,316         | 590           |
| Paternal body mass index        |               |              |               |               |
| <18.5                           | 128 (0.2)     | 34 (0.3)     | 99 (0.2)      | 29 (0.2)      |
| 18.5-24.9                       | 27,149 (44.8) | 5,059 (44.8) | 20,122 (44.1) | 7,027 (46.7)  |
| 25-29.9                         | 27,565 (45.4) | 5,005 (44.4) | 20,846 (45.7) | 6,719 (44.7)  |
| 30 or higher                    | 5,829 (9.6)   | 1,186 (10.5) | 4,560 (10.0)  | 1,269 (8.4)   |
| Missing                         | 2,955         | 8,857        | 1,992         | 963           |
| Paternal smoking                |               |              |               |               |
| No                              | 45,830 (72.4) | 8,363 (67.5) | 35,388 (74.6) | 10,442 (65.8) |
| Yes                             | 17,490 (27.6) | 4,033 (32.5) | 12,050 (25.4) | 5,440 (34.3)  |
| Missing                         | 306           | 7,745        | 181           | 125           |
| Paternal history of asthma      |               |              |               |               |
| No                              | 43,462 (91.3) | 7,510 (90.9) | 43,462 (91.3) | NA            |
| Yes                             | 4,157 (8.7)   | 751 (9.1)    | 4,157 (8.7)   | NA            |
| Missing                         | 16,007        | 11,880       | 0             | NA            |

<sup>a</sup> Values are expressed as mean (standard deviation).

<sup>b</sup> Weight (kg)/height (m)<sup>2</sup>.

**Web Table 3.** The pairwise correlation coefficients between the different measures of maternal psychosocial stress during pregnancy, Norwegian Mother and Child Cohort Study, 2000–2007

| Measure of Maternal Psychosocial Stress                       | Symptom Checklist 5 (SCL-5) at 18 gw <sup>a</sup> | Satisfaction With Life Scale at 18 gw <sup>b</sup> | Relationship Satisfaction at 18 gw <sup>b</sup> | Work Stress at 18 gw <sup>a</sup> | Social Support at 18 gw <sup>b</sup> | Lifetime Symptoms of Depression <sup>a</sup> | Symptom Checklist 5 (SCL-5) at 30 gw <sup>a</sup> | Satisfaction With Life Scale at 30 gw <sup>b</sup> | Relationship Satisfaction at 30 gw <sup>b</sup> | Negative Life Events in Past 12 Months at 30 gw <sup>a</sup> |
|---------------------------------------------------------------|---------------------------------------------------|----------------------------------------------------|-------------------------------------------------|-----------------------------------|--------------------------------------|----------------------------------------------|---------------------------------------------------|----------------------------------------------------|-------------------------------------------------|--------------------------------------------------------------|
| Symptom Checklist 5 (SCL-5) at 18 gw <sup>a</sup>             | 1                                                 |                                                    |                                                 |                                   |                                      |                                              |                                                   |                                                    |                                                 |                                                              |
| Satisfaction With Life Scale at 18 gw <sup>b</sup>            | -0.39                                             | 1                                                  |                                                 |                                   |                                      |                                              |                                                   |                                                    |                                                 |                                                              |
| Relationship satisfaction at 18 gw <sup>b</sup>               | -0.31                                             | 0.44                                               | 1                                               |                                   |                                      |                                              |                                                   |                                                    |                                                 |                                                              |
| Work stress at 18 gw <sup>a</sup>                             | 0.19                                              | -0.23                                              | -0.11                                           | 1                                 |                                      |                                              |                                                   |                                                    |                                                 |                                                              |
| Social support at 18 gw <sup>b</sup>                          | -0.32                                             | 0.33                                               | 0.30                                            | -0.18                             | 1                                    |                                              |                                                   |                                                    |                                                 |                                                              |
| Lifetime symptoms of depression <sup>a</sup>                  | 0.38                                              | -0.27                                              | -0.19                                           | 0.13                              | -0.24                                | 1                                            |                                                   |                                                    |                                                 |                                                              |
| Symptom Checklist 5 (SCL-5) at 30 gw <sup>a</sup>             | 0.58                                              | -0.30                                              | -0.24                                           | 0.16                              | -0.28                                | 0.37                                         | 1                                                 |                                                    |                                                 |                                                              |
| Satisfaction With Life Scale at 30 gw <sup>b</sup>            | -0.35                                             | 0.56                                               | 0.43                                            | -0.20                             | 0.32                                 | -0.25                                        | -0.37                                             | 1                                                  |                                                 |                                                              |
| Relationship satisfaction at 30 gw <sup>b</sup>               | -0.26                                             | 0.38                                               | 0.78                                            | -0.11                             | 0.29                                 | -0.17                                        | -0.31                                             | 0.49                                               | 1                                               |                                                              |
| Negative life events the past 12 months at 30 gw <sup>a</sup> | 0.28                                              | -0.20                                              | -0.15                                           | 0.16                              | -0.16                                | 0.27                                         | 0.28                                              | -0.21                                              | -0.16                                           | 1                                                            |

Abbreviation: gw, gestational weeks.

**Web Table 4.** Association between maternal symptoms of anxiety/depression during pregnancy and offspring asthma at 7 years defined by the Norwegian Prescription Database, Norwegian Mother and Child Cohort Study, 2000–2007

| Symptom Checklist 5 (SCL-5) <sup>a</sup> | Range of Scale | N      | No. of Cases | Median (IQR)   | Unadjusted |            | Adjusted <sup>b</sup> |            |
|------------------------------------------|----------------|--------|--------------|----------------|------------|------------|-----------------------|------------|
|                                          |                |        |              |                | RR         | 95% CI     | RR                    | 95% CI     |
| 18 gestational weeks                     | 1-4            | 62,438 | 2,610        | 1.0 (1.0, 1.4) | 1.31       | 1.20, 1.42 | 1.19                  | 1.09, 1.30 |
| 30 gestational weeks                     | 1-4            | 63,112 | 2,631        | 1.1 (1.0, 1.4) | 1.30       | 1.18, 1.43 | 1.16                  | 1.05, 1.28 |

CI, confidence interval; IQR, interquartile range; RR, relative risk.

<sup>a</sup> Higher scores indicate more stress.

<sup>b</sup> Adjusted for maternal age, parity, education, prepregnancy body mass index, smoking during pregnancy, history of asthma and use of medications for anxiety/depression during pregnancy.

**Web Table 5.** Associations of maternal use of anxiolytics, antidepressants and hypnotics during pregnancy with offspring asthma at 7 years defined by the Norwegian Prescription Database, Norwegian Mother and Child Cohort Study, 2000–2007

| Medication Group | Range of Scale | N      | No. of Cases | Unadjusted |            | Adjusted <sup>a</sup> |            |
|------------------|----------------|--------|--------------|------------|------------|-----------------------|------------|
|                  |                |        |              | RR         | 95% CI     | RR                    | 95% CI     |
| Anxiolytics      | No             | 63,273 | 2,642        | Referent   |            | Referent              |            |
|                  | Yes            | 353    | 17           | 1.15       | 0.72, 1.84 | 1.04                  | 0.65, 1.64 |
| Antidepressants  | No             | 63,009 | 2,621        | Referent   |            | Referent              |            |
|                  | Yes            | 617    | 38           | 1.48       | 1.09, 2.02 | 1.27                  | 0.92, 1.74 |
| Hypnotics        | No             | 63,381 | 2,650        | Referent   |            | Referent              |            |
|                  | Yes            | 245    | 9            | 0.88       | 0.46, 1.67 | 0.85                  | 0.45, 1.62 |

CI, confidence interval; RR, relative risk.

<sup>a</sup> Adjusted for maternal age, parity, education, prepregnancy body mass index, smoking during pregnancy, and history of asthma.

**Web Table 6.** Association of maternal psychosocial stress during pregnancy with offspring asthma at 7 years defined by the Norwegian Prescription Database, Norwegian Mother and Child Cohort Study, 2000–2007: sensitivity analysis without restricting to individuals with information from the questionnaire administered 6 months after delivery

| Measure of Maternal Psychosocial Stress During Pregnancy                     | Range of Scale | N      | No. of Cases | Median (IQR)   | Unadjusted |            | Adjusted <sup>a</sup> |            |
|------------------------------------------------------------------------------|----------------|--------|--------------|----------------|------------|------------|-----------------------|------------|
|                                                                              |                |        |              |                | RR         | 95% CI     | RR                    | 95% CI     |
| Symptom Checklist 5 (SCL-5) at 18 gestational weeks <sup>b</sup>             | 1-4            | 74,071 | 3,147        | 1.0 (1.0, 1.4) | 1.26       | 1.17, 1.36 | 1.17                  | 1.08, 1.26 |
| Satisfaction With Life Scale at 18 gestational weeks <sup>c</sup>            | 1-7            | 74,703 | 3,180        | 5.8 (5.2, 6.4) | 0.96       | 0.93, 0.99 | 1.00                  | 0.97, 1.03 |
| Relationship satisfaction at 18 gestational weeks <sup>c</sup>               | 1-6            | 71,833 | 3,026        | 5.4 (5.0, 5.8) | 0.97       | 0.92, 1.02 | 1.00                  | 0.95, 1.06 |
| Work stress at 18 gestational weeks <sup>b</sup>                             | 1-4            | 68,830 | 2,855        | 3.0 (2.8, 3.3) | 0.84       | 0.77, 0.92 | 0.94                  | 0.85, 1.03 |
| Social support at 18 gestational weeks <sup>c</sup>                          | 1-3            | 72,857 | 3,086        | 3.3 (3.0, 3.7) | 0.89       | 0.83, 0.96 | 0.96                  | 0.88, 1.04 |
| Lifetime symptoms of depression at 18 gestational weeks <sup>b</sup>         | 0-5            | 74,762 | 3,182        | 2.0 (0.0, 3.0) | 1.08       | 1.06, 1.11 | 1.06                  | 1.03, 1.08 |
| Lifetime history of major depressive symptoms at 18 gestational weeks        | No             | 57,692 | 2,298        | NA             | Referent   |            | Referent              |            |
|                                                                              | Yes            | 17,070 | 884          | NA             | 1.30       | 1.20, 1.40 | 1.20                  | 1.11, 1.30 |
| Symptom Checklist 5 (SCL-5) at 30 gestational weeks <sup>b</sup>             | 1-4            | 69,296 | 2,910        | 1.1 (1.0, 1.4) | 1.27       | 1.16, 1.38 | 1.15                  | 1.04, 1.26 |
| Satisfaction With Life Scale at 30 gestational weeks <sup>c</sup>            | 1-7            | 69,341 | 2,911        | 6.0 (5.4, 6.2) | 0.97       | 0.94, 1.01 | 1.02                  | 0.98, 1.05 |
| Relationship satisfaction at 30 gestational weeks <sup>c</sup>               | 1-6            | 68,552 | 2,866        | 5.5 (5.0, 5.8) | 1.01       | 0.95, 1.07 | 1.04                  | 0.98, 1.10 |
| Negative life events the past 12 months at 30 gestational weeks <sup>b</sup> | 0-8            | 69,934 | 2,939        | 1.0 (0.0, 2.0) | 1.14       | 1.11, 1.18 | 1.10                  | 1.06, 1.13 |

CI, confidence interval; IQR, interquartile range; RR, relative risk.

<sup>a</sup> Adjusted for maternal age, parity, education, prepregnancy body mass index, smoking during pregnancy and history of asthma.

<sup>b</sup> Higher scores indicate more stress.

<sup>c</sup> Higher scores indicate less stress.

**Web Table 7.** The pairwise correlation coefficients between the different measures of paternal psychosocial stress ascertained at recruitment, Norwegian Mother and Child Cohort Study, 2000–2007

| <b>Measure of Paternal Psychosocial Stress</b> | <b>Symptom Checklist 5 (SCL-5)</b> | <b>Satisfaction With Life Scale at 18 gw</b> | <b>Relationship Satisfaction at 18 gw</b> | <b>Lifetime Symptoms of Depression</b> |
|------------------------------------------------|------------------------------------|----------------------------------------------|-------------------------------------------|----------------------------------------|
| Symptom Checklist 5 (SCL-5)                    | 1                                  |                                              |                                           |                                        |
| Satisfaction With Life Scale                   | -0.36                              | 1                                            |                                           |                                        |
| Relationship satisfaction                      | -0.26                              | 0.41                                         | 1                                         |                                        |
| Lifetime symptoms of depression                | 0.41                               | -0.29                                        | -0.18                                     | 1                                      |

Abbreviation: gw, gestational weeks.



**Web Table 8.** The pairwise correlation coefficients of maternal and paternal psychosocial stress at recruitment around 18 gestational weeks, Norwegian Mother and Child Cohort Study, 2000–2007

| <b>Measure of Parental Psychosocial Stress</b> | <b>Correlation Coefficient</b> |
|------------------------------------------------|--------------------------------|
| Symptom Checklist 5 (SCL-5)                    | 0.19                           |
| Satisfaction With Life Scale                   | 0.25                           |
| Relationship satisfaction                      | 0.55                           |
| Lifetime symptoms of depression                | 0.18                           |

**Web Table 9.** Association between maternal psychosocial stress during pregnancy and offspring asthma at 7 years defined by the Norwegian Prescription Database, Norwegian Mother and Child Cohort Study, 2000–2007: sensitivity analysis among study sample used to evaluate paternal psychosocial stress

| Measure of Maternal Psychosocial Stress During Pregnancy              | Range of Scale | N      | No. of Cases | Median (IQR)   | Unadjusted |            | Adjusted <sup>a</sup> |            |
|-----------------------------------------------------------------------|----------------|--------|--------------|----------------|------------|------------|-----------------------|------------|
|                                                                       |                |        |              |                | RR         | 95% CI     | RR                    | 95% CI     |
| Symptom Checklist 5 (SCL-5) at 18 gestational weeks <sup>b</sup>      | 1-4            | 46,813 | 1,907        | 1.0 (1.0, 1.4) | 1.29       | 1.17, 1.43 | 1.18                  | 1.06, 1.31 |
| Satisfaction With Life Scale at 18 gestational weeks <sup>c</sup>     | 1-7            | 47,108 | 1,915        | 6.0 (5.4, 6.4) | 0.96       | 0.92, 1.00 | 1.01                  | 0.96, 1.05 |
| Relationship Satisfaction at 18 gestational weeks <sup>c</sup>        | 1-6            | 47,173 | 1,914        | 5.5 (5.1, 5.8) | 0.99       | 0.92, 1.07 | 1.03                  | 0.95, 1.12 |
| Work stress at 18 gestational weeks <sup>b</sup>                      | 1-4            | 43,980 | 1,736        | 3.0 (2.8, 3.3) | 1.17       | 1.05, 1.31 | 1.02                  | 0.90, 1.15 |
| Social support at 18 gestational weeks <sup>c</sup>                   | 1-3            | 47,378 | 1,926        | 3.3 (3.0, 3.7) | 0.87       | 0.79, 0.96 | 0.95                  | 0.85, 1.05 |
| Lifetime symptoms of depression at 18 gestational weeks <sup>b</sup>  | 0-5            | 47,113 | 1,917        | 2.0 (0.0, 3.0) | 1.07       | 1.05, 1.10 | 1.05                  | 1.02, 1.07 |
| Lifetime history of major depressive symptoms at 18 gestational weeks | No             | 36,816 | 1,419        | NA             | Referent   |            | Referent              |            |
|                                                                       | Yes            | 10,297 | 498          | NA             | 1.25       | 1.14, 1.39 | 1.14                  | 1.03, 1.27 |
| Symptom Checklist 5 (SCL-5) at 30 gestational weeks <sup>b</sup>      | 1-4            | 47,273 | 1,921        | 1.1 (1.0, 1.4) | 1.24       | 1.10, 1.39 | 1.10                  | 0.97, 1.24 |
| Satisfaction With Life Scale at 30 gestational weeks <sup>c</sup>     | 1-7            | 47,296 | 1,922        | 6.0 (5.4, 6.4) | 1.00       | 0.95, 1.05 | 1.05                  | 1.00, 1.10 |
| Relationship Satisfaction at 30 gestational weeks <sup>c</sup>        | 1-6            | 47,161 | 1,922        | 5.5 (5.1, 5.8) | 1.05       | 0.97, 1.14 | 1.09                  | 1.01, 1.19 |
| Negative Life Events at 30 gestational weeks <sup>b</sup>             | 0-8            | 47,619 | 1,939        | 1.0 (0.0, 1.0) | 1.15       | 1.11, 1.12 | 1.10                  | 1.06, 1.15 |
| Use of antidepressants, anxiolytics and/or hypnotics during pregnancy | No             | 46,836 | 1,895        | NA             | Referent   |            | Referent              |            |
|                                                                       | Yes            | 783    | 44           | NA             | 1.39       | 1.04, 1.86 | 1.23                  | 0.91, 1.65 |

CI, confidence interval; IQR, interquartile range; RR, relative risk.

<sup>a</sup> Adjusted for maternal age, parity, education, prepregnancy body mass index, smoking during pregnancy and history of asthma.

<sup>b</sup> Higher scores indicate more stress.

<sup>c</sup> Higher scores indicate less stress.

**Web Table 10.** Associations of maternal and paternal psychosocial stress with offspring asthma at 7 years defined by the Norwegian Prescription Database after mutual adjustment, Norwegian Mother and Child Cohort Study, 2000–2007

| Measure of Maternal Psychosocial Stress During Pregnancy at 18 Gestational Weeks         | Range of Scale | N      | No. of Cases | Median (IQR)   | Unadjusted |            | Adjusted <sup>a</sup> |            |
|------------------------------------------------------------------------------------------|----------------|--------|--------------|----------------|------------|------------|-----------------------|------------|
|                                                                                          |                |        |              |                | RR         | 95% CI     | RR                    | 95% CI     |
| Symptom Checklist 5 (SCL-5) <sup>b</sup>                                                 | 1-4            | 46,813 | 1,907        | 1.0 (1.0, 1.4) | 1.29       | 1.17, 1.43 | 1.18                  | 1.06, 1.32 |
| Satisfaction With Life Scale <sup>c</sup>                                                | 1-7            | 47,108 | 1,915        | 6.0 (5.4, 6.4) | 0.96       | 0.92, 1.00 | 1.01                  | 0.94, 1.03 |
| Relationship satisfaction <sup>c</sup>                                                   | 1-6            | 47,173 | 47,173       | 5.5 (5.1, 5.8) | 0.99       | 0.92, 1.07 | 1.00                  | 0.91, 1.09 |
| Lifetime symptoms of depression <sup>b</sup>                                             | 0-5            | 47,113 | 1,917        | 2.0 (0.0, 3.0) | 1.07       | 1.05, 1.10 | 1.04                  | 1.01, 1.07 |
| Lifetime history of major depressive symptoms                                            | No             | 36,816 | 1,419        | NA             | Referent   |            | Referent              |            |
|                                                                                          | Yes            | 10,297 | 498          | NA             | 1.25       | 1.14, 1.39 | 1.14                  | 1.03, 1.27 |
| <b>Measures of maternal psychosocial stress during pregnancy at 30 gestational weeks</b> |                |        |              |                |            |            |                       |            |
| Symptom Checklist 5 (SCL5) <sup>b</sup>                                                  | 1-4            | 47,273 | 1,921        | 1.1 (1.0, 1.4) | 1.24       | 1.10, 1.39 | 1.10                  | 0.97, 1.24 |
| Satisfaction With Life Scale <sup>c</sup>                                                | 1-7            | 47,296 | 1,922        | 6.0 (5.4, 6.4) | 1.00       | 0.95, 1.05 | 1.06                  | 1.00, 1.11 |
| Relationship satisfaction <sup>c</sup>                                                   | 1-6            | 47,161 | 1,922        | 5.5 (5.1, 5.8) | 1.05       | 0.97, 1.14 | 1.08                  | 0.99, 1.18 |
| Use of antidepressants, anxiolytics and/or hypnotics                                     | No             | 46,836 | 1,895        | NA             | Referent   |            | Referent              |            |
|                                                                                          | Yes            | 783    | 44           | NA             | 1.39       | 1.04, 1.86 | 1.24                  | 0.92, 1.67 |
| <b>Measures of paternal psychosocial stress</b>                                          |                |        |              |                |            |            |                       |            |
| Symptom Checklist 5 (SCL-5) <sup>b</sup>                                                 | 1-4            | 47,133 | 1,925        | 1.0 (1.0, 1.2) | 1.10       | 0.95, 1.27 | 0.99                  | 0.84, 1.17 |
| Satisfaction With Life Scale <sup>c</sup>                                                | 1-7            | 47,191 | 1,924        | 5.8 (5.2, 6.2) | 0.96       | 0.92, 1.01 | 0.98                  | 0.93, 1.03 |
| Relationship Satisfaction <sup>c</sup>                                                   | 1-6            | 47,033 | 1,917        | 5.4 (5.0, 5.8) | 1.03       | 0.95, 1.11 | 1.02                  | 0.93, 1.12 |
| Lifetime symptoms of depression <sup>b</sup>                                             | 0-5            | 47,088 | 1,925        | 0.0 (0.0, 2.0) | 1.05       | 1.02, 1.09 | 1.02                  | 0.98, 1.05 |
| Lifetime history of major depressive symptoms                                            | No             | 42,568 | 1,746        | NA             | Referent   |            | Referent              |            |
|                                                                                          | Yes            | 4,520  | 179          | NA             | 0.97       | 0.83, 1.12 | 0.92                  | 0.79, 1.08 |
| Use of antidepressants, anxiolytics and/or hypnotics                                     | No             | 46,894 | 1,911        | NA             | Referent   |            | Referent              |            |
|                                                                                          | Yes            | 725    | 28           | NA             | 0.95       | 0.66, 1.37 | 0.79                  | 0.53, 1.18 |

CI, confidence interval; NA, not applicable; IQR, interquartile range; RR, relative risk.

<sup>a</sup> Maternal psychosocial stress adjusted for maternal age, parity, education, prepregnancy body mass index, smoking during pregnancy, history of asthma, in addition to the same measure of paternal psychosocial stress. Paternal psychosocial stress adjusted for paternal age, education, body mass index, smoking, history of asthma, in addition to the same measure of maternal psychosocial stress.

<sup>b</sup> Higher scores indicate more stress

<sup>c</sup> Higher scores indicate less stress

**Web Table 11.** Association between maternal psychosocial stress during pregnancy and offspring asthma at 7 years defined by maternal report through questionnaire, Norwegian Mother and Child Cohort Study, 2000–2007

| Measure of Maternal Psychosocial Stress During Pregnancy              | Range of Scale | N      | No. of Cases | Median (IQR)   | Unadjusted |            | Adjusted <sup>a</sup> |            |
|-----------------------------------------------------------------------|----------------|--------|--------------|----------------|------------|------------|-----------------------|------------|
|                                                                       |                |        |              |                | RR         | 95% CI     | RR                    | 95% CI     |
| Symptom Checklist 5 (SCL-5) at 18 gestational weeks <sup>b</sup>      | 1-4            | 36,350 | 2,004        | 1.0 (1.0, 1.4) | 1.30       | 1.18, 1.43 | 1.21                  | 1.09, 1.34 |
| Satisfaction With Life Scale at 18 gestational weeks <sup>c</sup>     | 1-7            | 36,586 | 2,016        | 6.0 (5.4, 6.4) | 0.96       | 0.92, 0.99 | 0.99                  | 0.95, 1.03 |
| Relationship Satisfaction at 18 gestational weeks <sup>c</sup>        | 1-6            | 35,381 | 1,940        | 5.5 (5.0, 5.8) | 0.94       | 0.88, 1.01 | 0.96                  | 0.90, 1.03 |
| Work stress at 18 gestational weeks <sup>b</sup>                      | 1-4            | 34,478 | 1,855        | 2.0 (1.8, 2.3) | 1.24       | 1.11, 1.38 | 1.10                  | 0.97, 1.23 |
| Social support at 18 gestational weeks <sup>c</sup>                   | 1-3            | 35,700 | 1,960        | 3.3 (3.0, 3.7) | 0.94       | 0.85, 1.04 | 1.00                  | 0.90, 1.11 |
| Lifetime symptoms of depression at 18 gestational weeks <sup>b</sup>  | 0-5            | 36,584 | 2,010        | 1.0 (0.0, 3.0) | 1.09       | 1.06, 1.12 | 1.07                  | 1.04, 1.10 |
| Lifetime history of major depressive symptoms at 18 gestational weeks | No             | 28,916 | 1,495        | NA             | Referent   |            | Referent              |            |
|                                                                       | Yes            | 7,668  | 515          | NA             | 1.30       | 1.18, 1.43 | 1.22                  | 1.11, 1.35 |
| Symptom Checklist 5 (SCL-5) at 30 gestational weeks <sup>b</sup>      | 1-4            | 36,688 | 2,017        | 1.1 (1.0, 1.4) | 1.44       | 1.29, 1.60 | 1.32                  | 1.18, 1.47 |
| Satisfaction With Life Scale at 30 gestational weeks <sup>c</sup>     | 1-7            | 36,743 | 2,019        | 6.0 (5.4, 6.4) | 0.96       | 0.92, 1.00 | 0.99                  | 0.94, 1.03 |
| Relationship satisfaction at 30 gestational weeks <sup>c</sup>        | 1-6            | 36,407 | 2,003        | 5.5 (5.1, 5.8) | 0.96       | 0.90, 1.03 | 0.98                  | 0.92, 1.05 |
| Negative life events at 30 gestational weeks <sup>b</sup>             | 0-8            | 36,925 | 2,029        | 1.0 (0.0, 1.0) | 1.18       | 1.13, 1.22 | 1.12                  | 1.08, 1.17 |
| Use of antidepressants, anxiolytics and/or hypnotics                  | No             | 36,355 | 1,996        | NA             | Referent   |            | Referent              |            |
|                                                                       | Yes            | 570    | 33           | NA             | 1.05       | 0.75, 1.47 | 1.02                  | 0.73, 1.42 |

CI, confidence interval; IQR, interquartile range; NA, not applicable; RR, relative risk.

<sup>a</sup> Adjusted for maternal age, parity, education, prepregnancy body mass index, smoking during pregnancy and history of asthma.

<sup>b</sup> Higher scores indicate more stress.

<sup>c</sup> Higher scores indicate less stress.

**Web Table 12.** Association between paternal psychosocial stress and offspring asthma at 7 years defined by maternal report through questionnaire, Norwegian Mother and Child Cohort Study, 2000–2007

| Measure of Paternal Psychosocial Stress              | Range of Scale | N      | No. of Cases | Median (IQR)   | Unadjusted |            | Adjusted <sup>a</sup> |            |
|------------------------------------------------------|----------------|--------|--------------|----------------|------------|------------|-----------------------|------------|
|                                                      |                |        |              |                | RR         | 95% CI     | RR                    | 95% CI     |
| Symptom Checklist 5 (SCL-5) <sup>b</sup>             | 1-4            | 28,384 | 1,552        | 1.0 (1.0, 1.2) | 1.12       | 0.94, 1.33 | 1.11                  | 0.94, 1.32 |
| Satisfaction With Life Scale <sup>c</sup>            | 1-7            | 28,387 | 1,552        | 5.8 (5.2, 6.2) | 0.98       | 0.93, 1.03 | 0.98                  | 0.93, 1.03 |
| Relationship satisfaction <sup>c</sup>               | 1-6            | 28,298 | 1,552        | 5.4 (5.0, 5.8) | 0.97       | 0.89, 1.06 | 0.96                  | 0.88, 1.05 |
| Lifetime symptoms of depression <sup>b</sup>         | 0-5            | 28,358 | 1,553        | 0.0 (0.0, 2.0) | 1.07       | 1.04, 1.11 | 1.06                  | 1.03, 1.10 |
| Lifetime history of major depressive symptoms        | No             | 25,755 | 1,393        | NA             | Referent   |            | Referent              |            |
|                                                      | Yes            | 2,603  | 160          | NA             | 1.14       | 0.97, 1.33 | 1.16                  | 0.98, 1.37 |
| Use of antidepressants, anxiolytics and/or hypnotics | No             | 28,189 | 1,536        | NA             | Referent   |            | Referent              |            |
|                                                      | Yes            | 429    | 429          | NA             | 1.28       | 0.91, 1.82 | 1.13                  | 0.77, 1.65 |

CI, confidence interval; NA, not applicable; IQR, interquartile range; RR, relative risk.

<sup>a</sup> Adjusted for paternal age, education, body mass index, smoking and history of asthma.

<sup>b</sup> Higher scores indicate more stress.

<sup>c</sup> Higher scores indicate less stress.

**Web Table 13.** Association between maternal psychosocial stress 6 months after delivery and offspring asthma at 7 years defined by maternal report through questionnaire, Norwegian Mother and Child Cohort Study, 2000–2007

| Measure of Maternal Psychosocial Stress 6 Months After Delivery | Range of Scale | N      | No. of Cases | Median (IQR)   | Unadjusted |            | Adjusted Model 1 <sup>a</sup> |            | Adjusted Model 2 <sup>b</sup> |            |
|-----------------------------------------------------------------|----------------|--------|--------------|----------------|------------|------------|-------------------------------|------------|-------------------------------|------------|
|                                                                 |                |        |              |                | RR         | 95% CI     | RR                            | 95% CI     | RR                            | 95% CI     |
| Symptom Checklist 5 (SCL-5) <sup>c</sup>                        | 1-4            | 36,824 | 2,022        | 1.0 (1.0, 1.4) | 1.37       | 1.24, 1.51 | 1.29                          | 1.15, 1.44 | 1.22                          | 1.07, 1.39 |
| Satisfaction With Life Scale <sup>d</sup>                       | 1-7            | 36,562 | 2,004        | 6.0 (5.4, 6.4) | 0.92       | 0.88, 0.96 | 0.95                          | 0.91, 1.00 | 0.94                          | 0.89, 1.00 |
| Relationship satisfaction <sup>d</sup>                          | 1-6            | 36,012 | 1,966        | 5.4 (5.0, 5.8) | 0.92       | 0.87, 0.98 | 0.94                          | 0.88, 1.01 | 0.95                          | 0.87, 1.04 |
| Negative life events <sup>c</sup>                               | 0-10           | 36,925 | 2,029        | 0.0 (0.0, 1.0) | 1.23       | 1.19, 1.28 | 1.19                          | 1.14, 1.24 | 1.16                          | 1.11, 1.21 |
| Use of antidepressants, anxiolytics and/or hypnotics            | No             | 36,516 | 2,007        | NA             | Referent   |            | Referent                      |            | Referent                      |            |
|                                                                 | Yes            | 409    | 22           | NA             | 0.98       | 0.65, 1.47 | 0.84                          | 0.53, 1.33 | 0.81                          | 0.50, 1.33 |

CI, confidence interval; NA, not applicable; IQR, interquartile range; RR, relative risk.

<sup>a</sup> Model 1 Adjusted for maternal age, parity, education, smoking during pregnancy, prepregnancy body mass index, smoking the first 6 months of the child's life and history of asthma, in addition to child gender, birth weight, gestational age and breastfeeding the first 6 months.

<sup>b</sup> Model 2 Adjusted the same covariates described in model 1 and the same measure of psychosocial stress during pregnancy.

<sup>c</sup> Higher scores indicates more stress.

<sup>d</sup> Higher scores indicates less stress.

**Web Table 14.** A sibling analysis of paternal psychosocial stress and offspring asthma at 7 years defined by the Norwegian Prescription Database, Norwegian Mother and Child Cohort Study, 2000–2007

| Measure of Paternal Psychosocial Stress       | Range of Scale | N   | No. of Cases | Unadjusted |            | Adjusted <sup>a</sup> |            |
|-----------------------------------------------|----------------|-----|--------------|------------|------------|-----------------------|------------|
|                                               |                |     |              | OR         | 95% CI     | OR                    | 95% CI     |
| Symptom Checklist 5 (SCL-5) <sup>b</sup>      | 1-4            | 481 | 237          | 0.60       | 0.24, 1.51 | 0.46                  | 0.16, 1.31 |
| Satisfaction With Life Scale <sup>c</sup>     | 1-7            | 483 | 238          | 1.22       | 0.95, 1.57 | 1.24                  | 0.95, 1.62 |
| Relationship Satisfaction <sup>c</sup>        | 1-6            | 479 | 236          | 1.33       | 0.81, 2.20 | 1.50                  | 0.82, 2.73 |
| Lifetime symptoms of depression <sup>b</sup>  | 0-5            | 481 | 237          | 1.12       | 0.90, 1.40 | 1.16                  | 0.90, 1.49 |
| Lifetime history of major depressive symptoms | No             | 449 | 226          | Referent   |            | Referent              |            |
|                                               | Yes            | 32  | 11           | 0.40       | 0.15, 1.01 | 0.46                  | 0.15, 1.36 |

CI, confidence interval; OR, odds ratio.

<sup>a</sup> Adjusted for paternal age, education, body mass index, smoking and history of asthma.

<sup>b</sup> Higher scores indicate more stress.

<sup>c</sup> Higher scores indicate less stress.
